# Supplementary material for: Single-cell intratumoral stemness analysis reveals the involvement of cell cycle and DNA damage repair in two different types of esophageal cancer
Source: PubMed Central journal article supplement — Oncol Rep. 2019 Apr 15;41(6):3201–8. doi: 10.3892/or.2019.7117 (PMC6489016; doi:10.3892/or.2019.7117), 2019-04-15
Supplement: Supplementary_Data.pdf [file Supplementary_Data.pdf]

Figure S1. Expression of ESCC cancer stemness-associated DNA damage repair genes. (A) Expression of PARP4, DDX11, and RAD17 in high and low cancer stemness of ESCC. (B) Expression of PARP4 in various human cancers. T, tumor tissues; N, normal tissues; PARP4, poly(ADP-ribose) polymerase family member 4; ESCC, esophageal squamous cell carcinoma; DDX11, DEAD/H-Box Helicase 11; RAD17, RAD17 checkpoint clamp loader component; SI, stemness index.

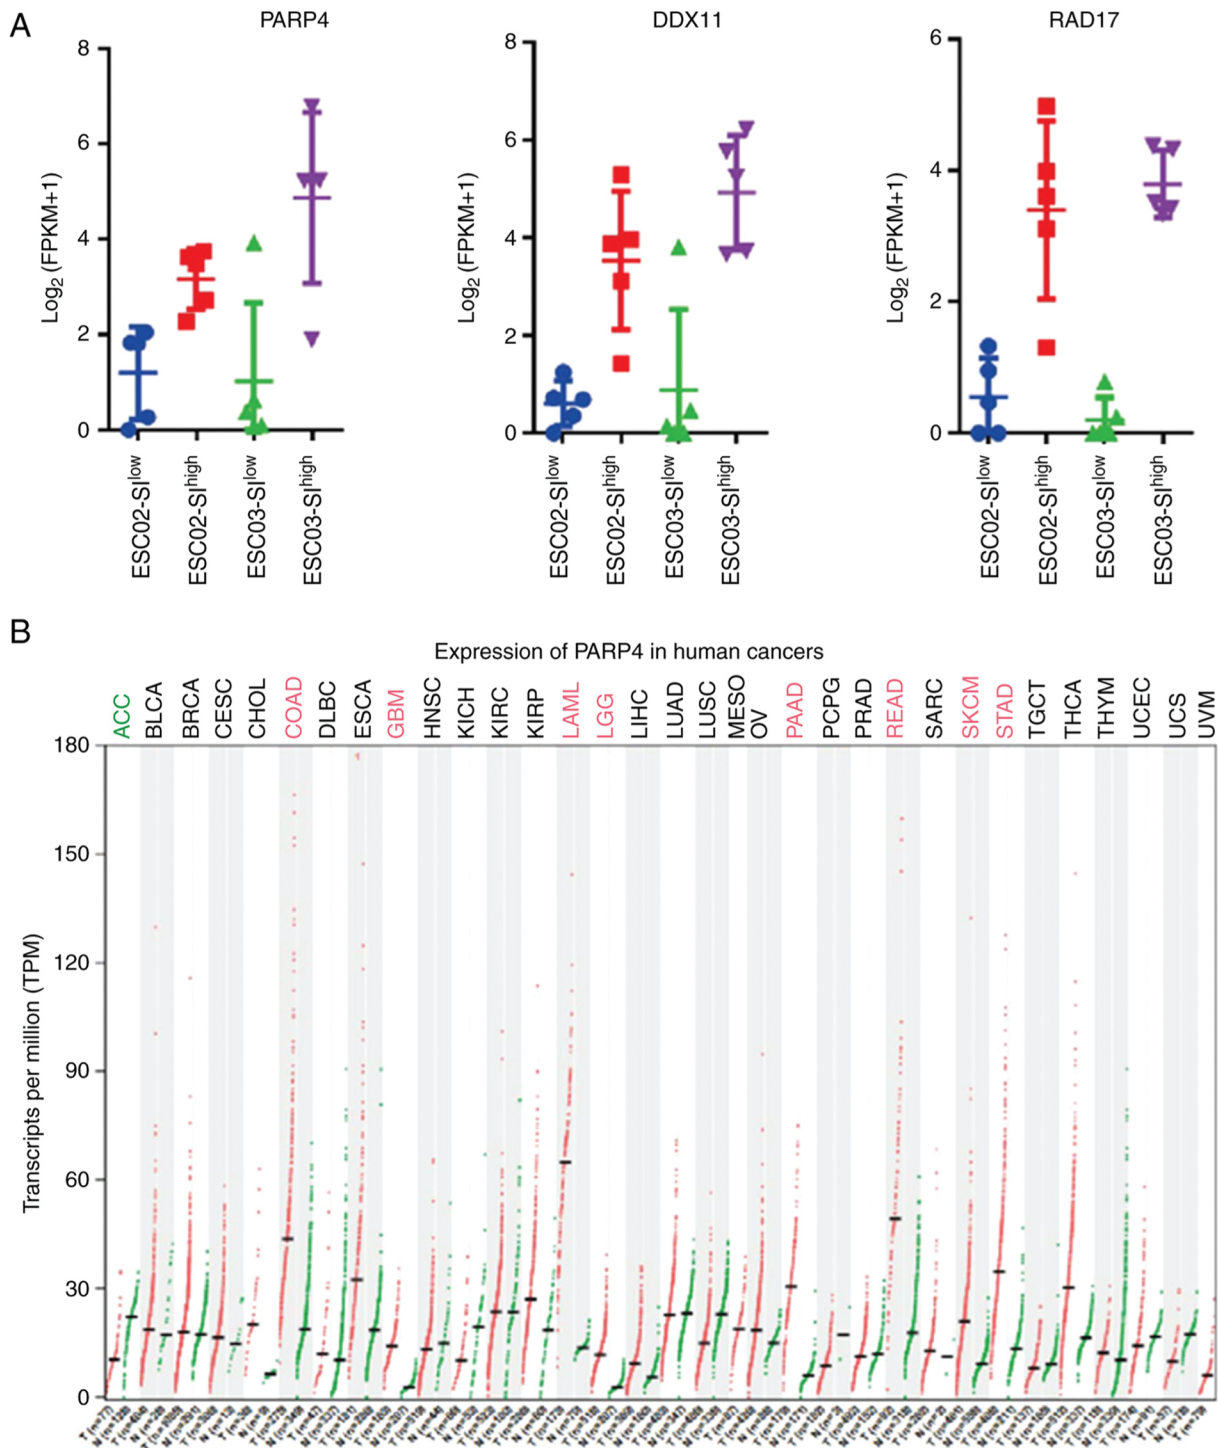

Figure S2. Upregulated PARP4 correlates with shorter overall survival and disease-free survival in CESC and LUSC, but not EAC. TPM, Transcripts per Kilobase Million; HR, hazard ratio; n, patient number; PARP4, poly(ADP-ribose) polymerase family member 4; CESC, cervical squamous cell carcinoma; LUSC, lung squamous cell carcinoma; EAC, esophageal adenocarcinoma.

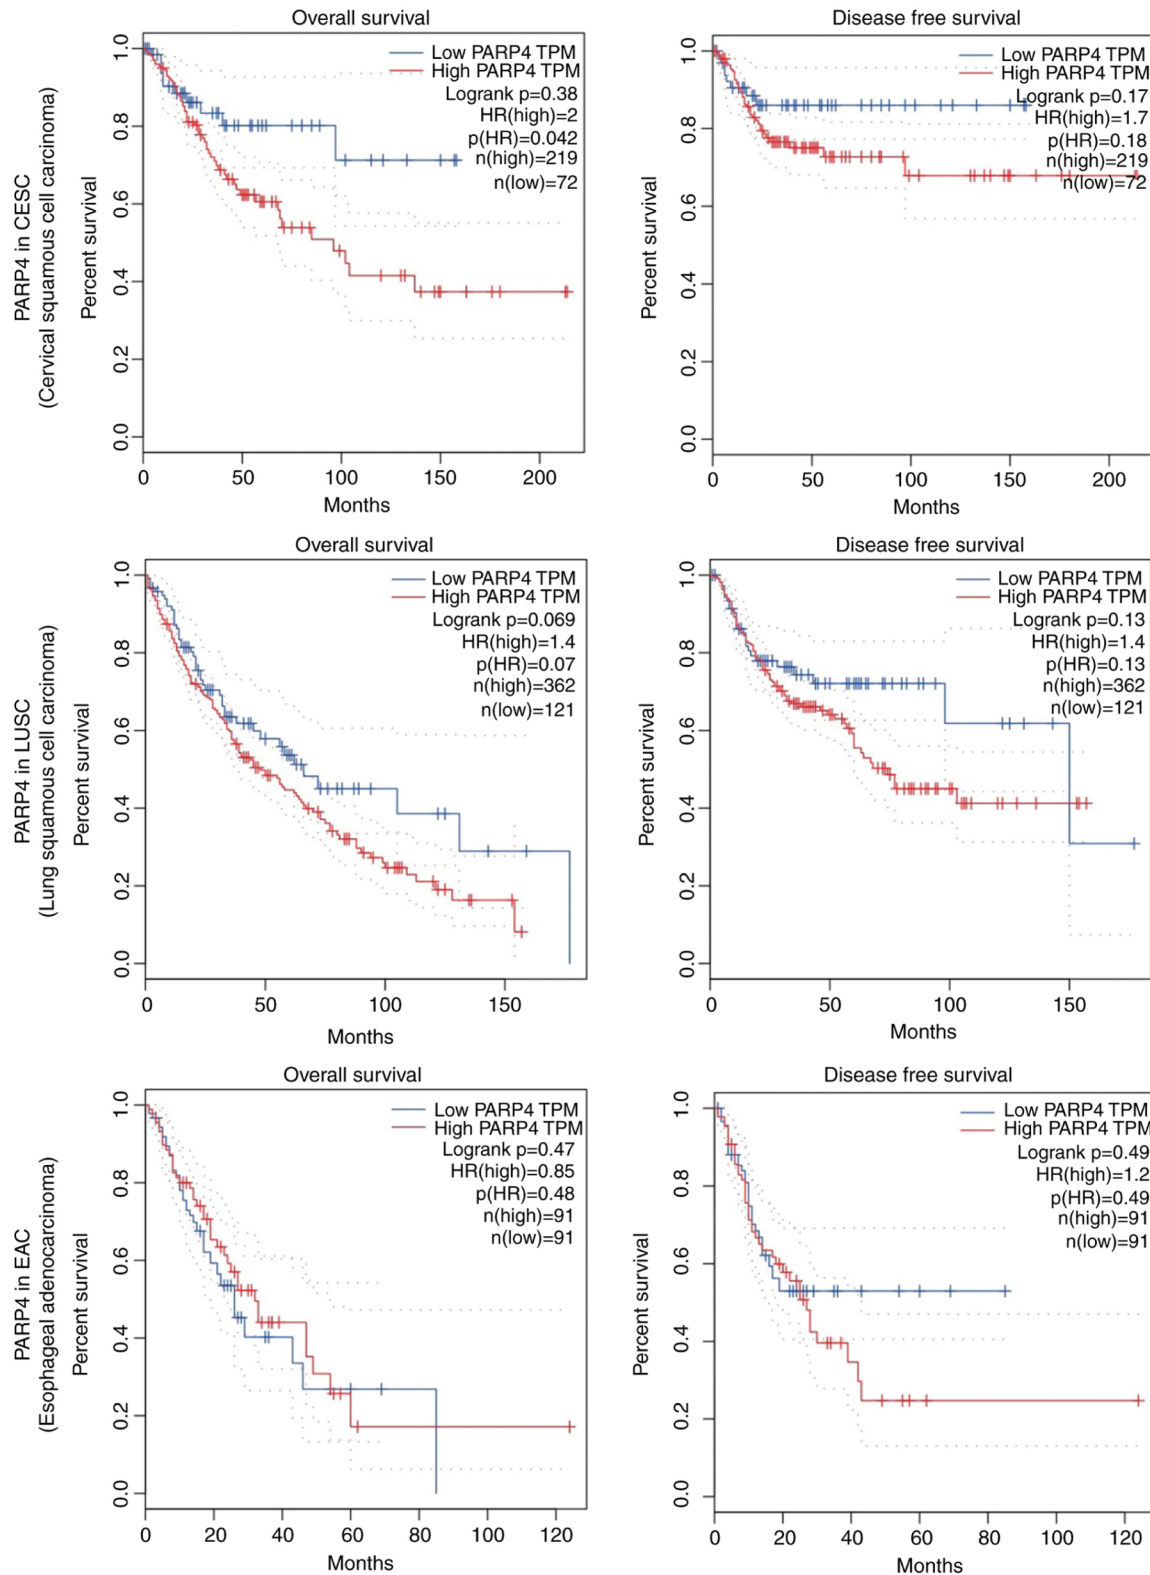

Figure S3. Expression level of PARP4 in the present ESCC cohort and its correlation with overall survival in patients. (A) Distribution of PARP4 with different IHC scores (from 0 to 3). (B) Correlation of different expression levels of PARP4 and overall survival in patients. poly(ADP-ribose) polymerase family member 4; ESCC, esophageal squamous cell carcinoma; IHC, immunohistochemical.

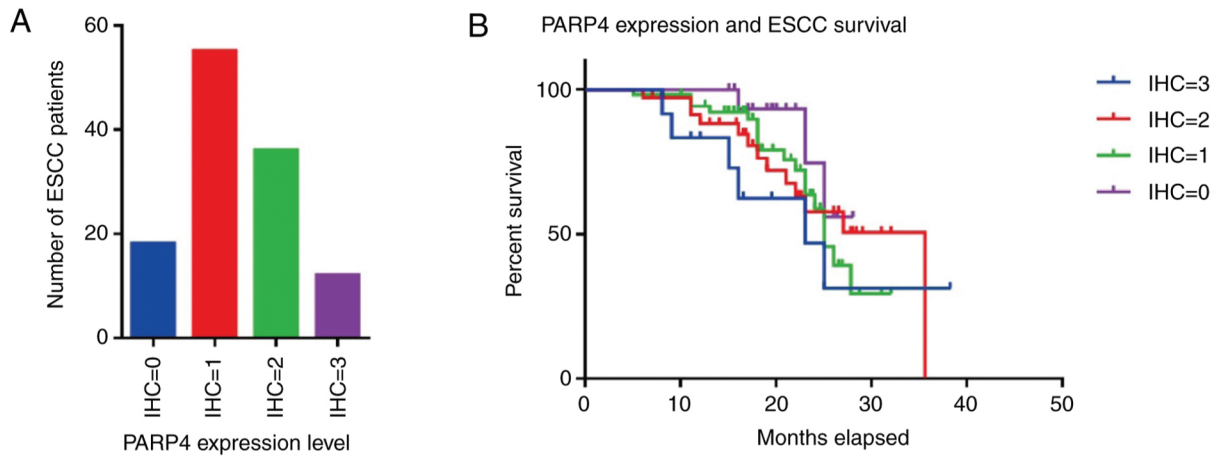

Table SI. List of stem cell markers used to calculate the SI.

| Stemness-associated genes (SI)                                                                                                                                           | Author, year                                         | (Refs.) |
|--------------------------------------------------------------------------------------------------------------------------------------------------------------------------|------------------------------------------------------|---------|
| EPHB2                                                                                                                                                                    | Jung <i>et al</i> , 2011; Batlle <i>et al</i> , 2002 | (1,2)   |
| LATS2, CXCL2, MLLT10, METTL3, EZH2, VEGFA,<br>EGFR, GPSM2, DNMT3A, HES1, MYC, RNF43,<br>AXIN2, CDK6, RGMB, CDCA7, AQP1, DPP4,<br>CFTR, TSPAN6, FERMT1, LRIG1, CA2, STMN1 | Dalerba <i>et al</i> , 2011                          | (3)     |
| ASCL2, OLFM4, LGR5, BMI1                                                                                                                                                 | Merlos-Suarez <i>et al</i> , 2011                    | (4)     |
| SMOC2, ETS2, GPX2, FAM84A                                                                                                                                                | Jung <i>et al</i> , 2015                             | (5)     |
| PTPRG, SLC12A2                                                                                                                                                           |                                                      |         |
| SI, stemness index.                                                                                                                                                      |                                                      |         |

Table SII. Genes responsible for esophageal adenocarcinoma stemness.

| Symbol  | Description                                  | Author, year                                                                                                                        | (Refs.) |
|---------|----------------------------------------------|-------------------------------------------------------------------------------------------------------------------------------------|---------|
| ACVR1B  | Activin A receptor type 1B                   |                                                                                                                                     |         |
| ALDH1A1 | Aldehyde dehydrogenase 1 family member A1    | Kulsum <i>et al</i> , 2017; Liu <i>et al</i> , 2016; Meng <i>et al</i> , 2014; Thomas <i>et al</i> , 2016; Yang <i>et al</i> , 2014 | (6-10)  |
| AURKA   | Aurora kinase A                              | Chen <i>et al</i> , 2017; Eterno <i>et al</i> , 2016; Yang <i>et al</i> , 2017; Zheng <i>et al</i> , 2016                           | (11-14) |
| CENPJ   | Centromere protein J                         |                                                                                                                                     |         |
| FAM168A | Family with sequence similarity 168 member A |                                                                                                                                     |         |
| GPR89B  | G protein-coupled receptor 89B               |                                                                                                                                     |         |
| HMGB2   | High mobility group box 2                    |                                                                                                                                     |         |
| LANCL2  | LanC like 2                                  |                                                                                                                                     |         |
| LONP2   | Lon peptidase 2, peroxisomal                 |                                                                                                                                     |         |
| PPP1R8  | Protein phosphatase 1 regulatory subunit 8   |                                                                                                                                     |         |
| PTDSS1  | Phosphatidylserine synthase 1                |                                                                                                                                     |         |
| RIF1    | Replication timing regulatory factor 1       | GursesCila <i>et al</i> , 2016; Li <i>et al</i> , 2015; Mei <i>et al</i> , 2017                                                     | (15-17) |
| SRSF8   | Serine and arginine rich splicing factor 8   |                                                                                                                                     |         |
| STMN1   | Stathmin 1                                   | Li <i>et al</i> , 2017; Obayashi <i>et al</i> , 2017                                                                                | (18,19) |
| TRIM59  | Tripartite motif containing 59               | Sang <i>et al</i> , 2018; Zhou <i>et al</i> , 2014                                                                                  | (20,21) |
| ZNF107  | Zinc finger protein 107                      |                                                                                                                                     |         |

Table SIII. Genes responsible for esophageal squamous cell carcinoma stemness.

| Symbol  | Description                                                                  | Author, year                                                                    | (Refs.) |
|---------|------------------------------------------------------------------------------|---------------------------------------------------------------------------------|---------|
| ANGEL2  | Angel homolog 2                                                              |                                                                                 |         |
| APPBP2  | Amyloid beta precursor protein binding protein 2                             |                                                                                 |         |
| BRD8    | Bromodomain containing 8                                                     |                                                                                 |         |
| CDCA7   | Cell division cycle associated 7                                             | Guiu <i>et al</i> , 2014                                                        | (22)    |
| CEP89   | Centrosomal protein 89                                                       |                                                                                 |         |
| CUL7    | Cullin 7                                                                     |                                                                                 |         |
| DDX11   | DEAD/H-box helicase 11                                                       |                                                                                 |         |
| ECHDC2  | Enoyl-CoA hydratase domain containing 2                                      |                                                                                 |         |
| FAM111A | Family with sequence similarity 111 member A                                 |                                                                                 |         |
| FAM13A  | Family with sequence similarity 13 member A                                  |                                                                                 |         |
| FBXW2   | F-box and WD repeat domain containing 2                                      |                                                                                 |         |
| FGFR1OP | FGFR1 oncogene partner                                                       |                                                                                 |         |
| FN3KRP  | Fructosamine 3 kinase related protein                                        |                                                                                 |         |
| GAR1    | GAR1 ribonucleoprotein                                                       |                                                                                 |         |
| GMCL1   | Germ cell-less, spermatogenesis associated 1                                 |                                                                                 |         |
| GNPDA1  | Glucosamine-6-phosphate deaminase 1                                          |                                                                                 |         |
| INTS4   | Integrator complex subunit 4                                                 |                                                                                 |         |
| KIF11   | kinesin family member 11                                                     | Imai <i>et al</i> , 2017; Jiang <i>et al</i> , 2017; Venere <i>et al</i> , 2015 | (23-25) |
| MGAT1   | Mannosyl (alpha-1,3-)-glycoprotein beta-1,2-N- acetylglucosaminyltransferase |                                                                                 |         |
| MPP1    | Membrane palmitoylated protein 1                                             |                                                                                 |         |
| NBPF1   | Neuroblastoma breakpoint family member 1                                     |                                                                                 |         |
| OGFOD3  | 2-oxoglutarate and iron dependent oxygenase domain containing 3              |                                                                                 |         |
| PAK1IP1 | PAK1 interacting protein 1                                                   |                                                                                 |         |
| PARP4   | Poly(ADP-ribose) polymerase family member 4                                  |                                                                                 |         |
| PRIM2   | Primase (DNA) subunit 2                                                      |                                                                                 |         |
| RAD17   | RAD17 checkpoint clamp loader component                                      |                                                                                 |         |
| SNIP1   | Smad nuclear interacting protein 1                                           |                                                                                 |         |
| TPRA1   | Transmembrane protein adipocyte associated 1                                 |                                                                                 |         |
| TRAF5   | TNF receptor associated factor 5                                             |                                                                                 |         |
| USP11   | Ubiquitin specific peptidase 11                                              |                                                                                 |         |
| WDR92   | WD repeat domain 92                                                          |                                                                                 |         |
| WLS     | Wntless Wnt ligand secretion mediator                                        | Augustin <i>et al</i> , 2017; Augustin <i>et al</i> , 2016                      | (26,27) |
| ZADH2   | Zinc binding alcohol dehydrogenase domain containing 2                       |                                                                                 |         |
| ZMYM2   | Cinc finger MYM-type containing 2                                            | Ren <i>et al</i> , 2011; Ren <i>et al</i> , 2016                                | (28,29) |
| ZNF761  | Zinc finger protein 761                                                      |                                                                                 |         |

Table SIV. Patients' information and PARP4 expression in our ESCC cohort.

| Patient ID | Diagnosis age | Sex    | Cancer type                        | American Joint Committee on Cancer Tumor Stage Code | Neoplasm Disease Lymph Node Stage American Joint Committee on Cancer Code | Vital status | OS_time (Months) | IHC score for PARP4 |
|------------|---------------|--------|------------------------------------|-----------------------------------------------------|---------------------------------------------------------------------------|--------------|------------------|---------------------|
| 201200100  | 77            | Female | Esophageal squamous cell carcinoma | T3                                                  | N2                                                                        | Dead         | 23.00            | 1                   |
| 201200101  | 71            | Male   | Esophageal squamous cell carcinoma | T3                                                  | N3                                                                        | Dead         | 8.00             | 3                   |
| 201200426  | 66            | Male   | Esophageal squamous cell carcinoma | T4                                                  | N2                                                                        | Dead         | 17.00            | 1                   |
| 201200428  | 58            | Female | Esophageal squamous cell carcinoma | T1                                                  | N0                                                                        | Alive        | 18.50            | 1                   |
| 201200562  | 63            | Male   | Esophageal squamous cell carcinoma | T2                                                  | N1                                                                        | Alive        | 26.50            | 1                   |
| 201200638  | 69            | Male   | Esophageal squamous cell carcinoma | T1                                                  | N1                                                                        | Alive        | 15.80            | 2                   |
| 201200640  | 60            | Male   | Esophageal squamous cell carcinoma | T4                                                  | N2                                                                        | Dead         | 16.00            | 3                   |
| 201200878  | 62            | Female | Esophageal squamous cell carcinoma | T1                                                  | N0                                                                        | Alive        | 22.60            | 2                   |
| 201200905  | 65            | Female | Esophageal squamous cell carcinoma | T3                                                  | N2                                                                        | Dead         | 19.00            | 2                   |
| 201200907  | 63            | Male   | Esophageal squamous cell carcinoma | T4                                                  | N3                                                                        | Dead         | 18.00            | 1                   |
| 201200911  | 68            | Male   | Esophageal squamous cell carcinoma | T3                                                  | N2                                                                        | Dead         | 16.00            | 2                   |
| 201201066  | 53            | Male   | Esophageal squamous cell carcinoma | T2                                                  | N1                                                                        | Alive        | 19.00            | 0                   |
| 201201187  | 60            | Male   | Esophageal squamous cell carcinoma | T4                                                  | N1                                                                        | Alive        | 28.00            | 0                   |
| 201201480  | 71            | Male   | Esophageal squamous cell carcinoma | T2                                                  | N1                                                                        | Alive        | 38.20            | 3                   |
| 201201689  | 47            | Female | Esophageal squamous cell carcinoma | T1                                                  | N0                                                                        | Alive        | 17.50            | 1                   |
| 201202134  | 64            | Female | Esophageal squamous cell carcinoma | T2                                                  | N2                                                                        | Alive        | 14.90            | 1                   |
| 201202137  | 63            | Male   | Esophageal squamous cell carcinoma | T1                                                  | N0                                                                        | Alive        | 15.60            | 0                   |
| 201202138  | 66            | Male   | Esophageal squamous cell carcinoma | T4                                                  | N3                                                                        | Dead         | 27.80            | 1                   |
| 201202143  | 68            | Male   | Esophageal squamous cell carcinoma | T3                                                  | N0                                                                        | Alive        | 16.80            | 2                   |
| 201202232  | 58            | Male   | Esophageal squamous cell carcinoma | T2                                                  | N2                                                                        | Alive        | 12.50            | 1                   |
| 201202233  | 62            | Male   | Esophageal squamous cell carcinoma | T3                                                  | N2                                                                        | Alive        | 23.80            | 1                   |
| 201202347  | 66            | Male   | Esophageal squamous cell carcinoma | T4                                                  | N1                                                                        | Alive        | 25.00            | 3                   |
| 201202351  | 68            | Male   | Esophageal squamous cell carcinoma | T3                                                  | N3                                                                        | Dead         | 15.00            | 3                   |
| 201202354  | 72            | Male   | Esophageal squamous cell carcinoma | T4                                                  | N2                                                                        | Dead         | 25.00            | 3                   |
| 201202478  | 64            | Female | Esophageal squamous cell carcinoma | T3                                                  | N1                                                                        | Dead         | 18.00            | 1                   |
| 201202481  | 60            | Male   | Esophageal squamous cell carcinoma | T1                                                  | N0                                                                        | Alive        | 24.10            | 1                   |
| 201202486  | 60            | Female | Esophageal squamous cell carcinoma | T2                                                  | N1                                                                        | Alive        | 26.90            | 1                   |
| 201202492  | 50            | Female | Esophageal squamous cell carcinoma | T3                                                  | N3                                                                        | Dead         | 26.00            | 1                   |
| 201202500  | 72            | Female | Esophageal squamous cell carcinoma | T4                                                  | N2                                                                        | Dead         | 23.00            | 3                   |
| 201202562  | 69            | Male   | Esophageal squamous cell carcinoma | T2                                                  | N1                                                                        | Alive        | 27.80            | 2                   |
| 201202573  | 58            | Male   | Esophageal squamous cell carcinoma | T4                                                  | N3                                                                        | Dead         | 21.00            | 2                   |
| 201202588  | 60            | Male   | Esophageal squamous cell carcinoma | T1                                                  | N1                                                                        | Alive        | 8.00             | 2                   |
| 201202591  | 59            | Female | Esophageal squamous cell carcinoma | T3                                                  | N0                                                                        | Dead         | 13.00            | 1                   |
| 201202594  | 52            | Male   | Esophageal squamous cell carcinoma | T3                                                  | N1                                                                        | Alive        | 28.00            | 2                   |
| 201202680  | 57            | Female | Esophageal squamous cell carcinoma | T1                                                  | N2                                                                        | Alive        | 29.00            | 2                   |
| 201202684  | 81            | Male   | Esophageal squamous cell carcinoma | T2                                                  | N2                                                                        | Alive        | 31.00            | 2                   |

Table SIV. Continued.

| Patient ID | Diagnosis age | Sex    | Cancer type                        | American Joint Committee on Cancer Tumor Stage Code | Neoplasm Disease Lymph Node Stage American Joint Committee on Cancer Code | Vital status | OS_time (Months) | IHC score for PARP4 |
|------------|---------------|--------|------------------------------------|-----------------------------------------------------|---------------------------------------------------------------------------|--------------|------------------|---------------------|
| 201202954  | 69            | Female | Esophageal squamous cell carcinoma | T1                                                  | N1                                                                        | Alive        | 32.00            | 2                   |
| 201202960  | 60            | Male   | Esophageal squamous cell carcinoma | T1                                                  | N3                                                                        | Alive        | 14.00            | 2                   |
| 201202961  | 20            | Female | Esophageal squamous cell carcinoma | T2                                                  | N0                                                                        | Alive        | 13.00            | 2                   |
| 201202963  | 58            | Male   | Esophageal squamous cell carcinoma | T3                                                  | N1                                                                        | Dead         | 24.00            | 1                   |
| 201203039  | 58            | Male   | Esophageal squamous cell carcinoma | T4                                                  | N0                                                                        | Dead         | 18.00            | 1                   |
| 201203040  | 64            | Male   | Esophageal squamous cell carcinoma | T2                                                  | N2                                                                        | Alive        | 15.00            | 0                   |
| 201203043  | 66            | Female | Esophageal squamous cell carcinoma | T1                                                  | N3                                                                        | Alive        | 16.50            | 1                   |
| 201203044  | 75            | Female | Esophageal squamous cell carcinoma | T2                                                  | N2                                                                        | Alive        | 18.50            | 1                   |
| 201203145  | 70            | Male   | Esophageal squamous cell carcinoma | T4                                                  | N1                                                                        | Alive        | 22.00            | 1                   |
| 201203225  | 61            | Male   | Esophageal squamous cell carcinoma | 5                                                   | N1                                                                        | Alive        | 23.50            | 1                   |
| 201203298  | 65            | Male   | Esophageal squamous cell carcinoma | T2                                                  | N2                                                                        | Alive        | 24.60            | 1                   |
| 201203301  | 62            | Male   | Esophageal squamous cell carcinoma | T3                                                  | N1                                                                        | Alive        | 22.30            | 2                   |
| 201203302  | 45            | Male   | Esophageal squamous cell carcinoma | T3                                                  | N0                                                                        | Alive        | 28.40            | 2                   |
| 201203324  | 57            | Male   | Esophageal squamous cell carcinoma | T3                                                  | N0                                                                        | Alive        | 17.50            | 0                   |
| 201203325  | 64            | Male   | Esophageal squamous cell carcinoma | T1                                                  | N1                                                                        | Alive        | 22.00            | 0                   |
| 201203406  | 70            | Female | Esophageal squamous cell carcinoma | T1                                                  | N2                                                                        | Alive        | 32.00            | 1                   |
| 201203408  | 60            | Female | Esophageal squamous cell carcinoma | T1                                                  | N3                                                                        | Alive        | 12.00            | 2                   |
| 201203415  | 68            | Male   | Esophageal squamous cell carcinoma | T1                                                  | N0                                                                        | Alive        | 18.00            | 1                   |
| 201203416  | 56            | Male   | Esophageal squamous cell carcinoma | T2                                                  | N1                                                                        | Alive        | 14.50            | 1                   |
| 201203427  | 70            | Male   | Esophageal squamous cell carcinoma | T2                                                  | N0                                                                        | Alive        | 16.80            | 1                   |
| 201203507  | 62            | Male   | Esophageal squamous cell carcinoma | T3                                                  | N2                                                                        | Dead         | 25.00            | 1                   |
| 201203594  | 72            | Female | Esophageal squamous cell carcinoma | T3                                                  | N3                                                                        | Alive        | 18.40            | 1                   |
| 201203611  | 66            | Male   | Esophageal squamous cell carcinoma | T3                                                  | N0                                                                        | Dead         | 25.00            | 1                   |
| 201203700  | 71            | Female | Esophageal squamous cell carcinoma | T3                                                  | N1                                                                        | Alive        | 19.60            | 1                   |
| 201203714  | 50            | Male   | Esophageal squamous cell carcinoma | T3                                                  | N2                                                                        | Dead         | 23.00            | 2                   |
| 201203807  | 72            | Male   | Esophageal squamous cell carcinoma | T2                                                  | N3                                                                        | Alive        | 22.00            | 1                   |
| 201204016  | 47            | Male   | Esophageal squamous cell carcinoma | T3                                                  | N3                                                                        | Alive        | 21.50            | 1                   |
| 201204030  | 76            | Male   | Esophageal squamous cell carcinoma | T2                                                  | N2                                                                        | Dead         | 16.00            | 0                   |
| 201204032  | 57            | Female | Esophageal squamous cell carcinoma | T2                                                  | N3                                                                        | Alive        | 22.50            | 1                   |
| 201204033  | 68            | Male   | Esophageal squamous cell carcinoma | T3                                                  | N0                                                                        | Alive        | 26.50            | 2                   |
| 201204113  | 48            | Female | Esophageal squamous cell carcinoma | T2                                                  | N1                                                                        | Alive        | 28.70            | 1                   |
| 201204114  | 60            | Female | Esophageal squamous cell carcinoma | T3                                                  | N2                                                                        | Alive        | 26.40            | 0                   |
| 201204382  | 70            | Female | Esophageal squamous cell carcinoma | T4                                                  | N3                                                                        | Alive        | 26.00            | 0                   |
| 201204392  | 60            | Male   | Esophageal squamous cell carcinoma | T4                                                  | N0                                                                        | Alive        | 21.00            | 0                   |
| 201204400  | 45            | Female | Esophageal squamous cell carcinoma | T4                                                  | N1                                                                        | Alive        | 20.00            | 0                   |
| 201204446  | 69            | Male   | Esophageal squamous cell carcinoma | T3                                                  | N1                                                                        | Alive        | 19.00            | 2                   |



Table SIV. Continued.

| Patient ID | Diagnosis age | Sex    | Cancer type                        | American Joint Committee on Cancer Tumor Stage Code | Neoplasm Disease Lymph Node Stage American Joint Committee on Cancer Code | Vital status | OS_time (Months) | IHC score for PARP4 |
|------------|---------------|--------|------------------------------------|-----------------------------------------------------|---------------------------------------------------------------------------|--------------|------------------|---------------------|
| 201204454  | 67            | Female | Esophageal squamous cell carcinoma | T3                                                  | N1                                                                        | Dead         | 11.00            | 1                   |
| 201204467  | 61            | Male   | Esophageal squamous cell carcinoma | T3                                                  | N0                                                                        | Alive        | 18.00            | 1                   |
| 201204470  | 74            | Female | Esophageal squamous cell carcinoma | T3                                                  | N2                                                                        | Alive        | 17.00            | 0                   |
| 201204562  | 69            | Female | Esophageal squamous cell carcinoma | T3                                                  | N2                                                                        | Alive        | 15.00            | 0                   |
| 201204564  | 66            | Male   | Esophageal squamous cell carcinoma | T2                                                  | N0                                                                        | Alive        | 16.00            | 1                   |
| 201204569  | 74            | Male   | Esophageal squamous cell carcinoma | T2                                                  | N1                                                                        | Alive        | 14.50            | 1                   |
| 201204622  | 63            | Male   | Esophageal squamous cell carcinoma | T2                                                  | N0                                                                        | Alive        | 15.50            | 1                   |
| 201204630  | 75            | Male   | Esophageal squamous cell carcinoma | T2                                                  | N2                                                                        | Dead         | 17.00            | 2                   |
| 201204707  | 74            | Male   | Esophageal squamous cell carcinoma | T2                                                  | N0                                                                        | Alive        | 16.50            | 2                   |
| 201204727  | 71            | Male   | Esophageal squamous cell carcinoma | T1                                                  | N1                                                                        | Alive        | 17.50            | 1                   |
| 201204738  | 64            | Female | Esophageal squamous cell carcinoma | T3                                                  | N0                                                                        | Dead         | 5.00             | 1                   |
| 201204820  | 63            | Male   | Esophageal squamous cell carcinoma | T3                                                  | N1                                                                        | Alive        | 19.50            | 0                   |
| 201204914  | 59            | Male   | Esophageal squamous cell carcinoma | T4                                                  | N3                                                                        | Alive        | 17.50            | 0                   |
| 201204928  | 60            | Female | Esophageal squamous cell carcinoma | T4                                                  | N0                                                                        | Dead         | 23.00            | 0                   |
| 201205040  | 48            | Male   | Esophageal squamous cell carcinoma | T3                                                  | N1                                                                        | Alive        | 19.60            | 0                   |
| 201205095  | 69            | Male   | Esophageal squamous cell carcinoma | T2                                                  | N0                                                                        | Alive        | 18.50            | 1                   |
| 201205113  | 69            | Male   | Esophageal squamous cell carcinoma | T3                                                  | N2                                                                        | Dead         | 25.00            | 0                   |
| 201205176  | 62            | Female | Esophageal squamous cell carcinoma | T2                                                  | N0                                                                        | Alive        | 17.50            | 2                   |
| 201205183  | 67            | Male   | Esophageal squamous cell carcinoma | T3                                                  | N1                                                                        | Alive        | 11.00            | 2                   |
| 201205184  | 72            | Male   | Esophageal squamous cell carcinoma | T3                                                  | N0                                                                        | Dead         | 22.00            | 2                   |
| 201205190  | 62            | Female | Esophageal squamous cell carcinoma | T1                                                  | N1                                                                        | Alive        | 12.00            | 3                   |
| 201205268  | 77            | Male   | Esophageal squamous cell carcinoma | T4                                                  | N2                                                                        | Dead         | 9.00             | 3                   |
| 201205277  | 64            | Male   | Esophageal squamous cell carcinoma | T4                                                  | N3                                                                        | Alive        | 13.00            | 1                   |
| 201205278  | 75            | Female | Esophageal squamous cell carcinoma | T1                                                  | N0                                                                        | Alive        | 14.00            | 2                   |
| 201205285  | 55            | Male   | Esophageal squamous cell carcinoma | T3                                                  | N2                                                                        | Dead         | 11.00            | 2                   |
| 201205286  | 63            | Male   | Esophageal squamous cell carcinoma | T4                                                  | N3                                                                        | Dead         | 11.00            | 1                   |
| 201205294  | 49            | Female | Esophageal squamous cell carcinoma | T2                                                  | N0                                                                        | Alive        | 19.50            | 3                   |
| 201205547  | 68            | Female | Esophageal squamous cell carcinoma | T3                                                  | N1                                                                        | Alive        | 7.00             | 1                   |
| 201205562  | 59            | Male   | Esophageal squamous cell carcinoma | T4                                                  | N0                                                                        | Alive        | 6.00             | 1                   |
| 201205584  | 58            | Male   | Esophageal squamous cell carcinoma | T1                                                  | N3                                                                        | Alive        | 16.50            | 3                   |
| 201205770  | 76            | Male   | Esophageal squamous cell carcinoma | T3                                                  | N0                                                                        | Alive        | 26.50            | 2                   |
| 201206004  | 68            | Male   | Esophageal squamous cell carcinoma | T3                                                  | N3                                                                        | Dead         | 18.00            | 1                   |
| 201206074  | 63            | Male   | Esophageal squamous cell carcinoma | T3                                                  | N2                                                                        | Dead         | 27.00            | 2                   |
| 201206075  | 69            | Female | Esophageal squamous cell carcinoma | T1                                                  | N0                                                                        | Alive        | 8.00             | 1                   |
| 201206217  | 73            | Male   | Esophageal squamous cell carcinoma | T1                                                  | N1                                                                        | Dead         | 18.00            | 2                   |
| 201206231  | 56            | Male   | Esophageal squamous cell carcinoma | T2                                                  | N2                                                                        | Dead         | 12.00            | 2                   |

Table SIV. Continued.

| Patient ID | Diagnosis age | Sex    | Cancer type                        | American Joint Committee on Cancer Tumor Stage Code | Neoplasm Disease Lymph Node Stage American Joint Committee on Cancer Code | Vital status | OS_time (Months) | IHC score for PARP4 |
|------------|---------------|--------|------------------------------------|-----------------------------------------------------|---------------------------------------------------------------------------|--------------|------------------|---------------------|
| 201206239  | 60            | Female | Esophageal squamous cell carcinoma | T1                                                  | N1                                                                        | Dead         | 23.00            | 1                   |
| 201206321  | 60            | Male   | Esophageal squamous cell carcinoma | T3                                                  | N1                                                                        | Alive        | 7.00             | 2                   |
| 201206336  | 54            | Male   | Esophageal squamous cell carcinoma | T2                                                  | N2                                                                        | Dead         | 22.00            | 1                   |
| 201206356  | 68            | Male   | Esophageal squamous cell carcinoma | T1                                                  | N3                                                                        | Alive        | 15.00            | 1                   |
| 201206436  | 57            | Male   | Esophageal squamous cell carcinoma | T1                                                  | N3                                                                        | Alive        | 24.00            | 1                   |
| 201206439  | 55            | Male   | Esophageal squamous cell carcinoma | T2                                                  | N2                                                                        | Alive        | 26.00            | 2                   |
| 201206442  | 62            | Female | Esophageal squamous cell carcinoma | T3                                                  | N1                                                                        | Dead         | 20.80            | 1                   |
| 201206443  | 62            | Male   | Esophageal squamous cell carcinoma | T4                                                  | N0                                                                        | Alive        | 31.00            | 1                   |
| 201206516  | 62            | Male   | Esophageal squamous cell carcinoma | T3                                                  | N2                                                                        | Alive        | 11.00            | 3                   |
| 201206628  | 55            | Male   | Esophageal squamous cell carcinoma | T2                                                  | N3                                                                        | Alive        | 10.00            | 1                   |
| 201206632  | 71            | Male   | Esophageal squamous cell carcinoma | T2                                                  | N0                                                                        | Dead         | 11.00            | 2                   |
| 201206731  | 59            | Male   | Esophageal squamous cell carcinoma | T1                                                  | N1                                                                        | Alive        | 35.57            | 2                   |
| 201206738  | 62            | Male   | Esophageal squamous cell carcinoma | T1                                                  | N1                                                                        | Dead         | 6.00             | 2                   |

IHC, immunohistochemical.

## References

1. Jung P, Sato T, Merlos-Suarez A, Barriga FM, Iglesias M, Rossell D, Auer H, Gallardo M, Blasco MA, Sancho E, *et al*: Isolation and in vitro expansion of human colonic stem cells. *Nat Med* 17: 1225-1227, 2011.
2. Batlle E, Henderson JT, Beghtel H, van den Born MM, Sancho E, Huls G, Meeldijk J, Robertson J, van de Wetering M, Pawson T and Clevers H: Beta-catenin and TCF mediate cell positioning in the intestinal epithelium by controlling the expression of EphB/ephrinB. *Cell* 111: 251-263, 2002.
3. Dalerba P, Kalisky T, Sahoo D, Rajendran PS, Rothenberg ME, Leyrat AA, Sim S, Okamoto J, Johnston DM, Qian D, *et al*: Single-cell dissection of transcriptional heterogeneity in human colon tumors. *Nat Biotechnol* 29: 1120-1127, 2011.
4. Merlos-Suarez A, Barriga FM, Jung P, Iglesias M, Cespedes MV, Rossell D, Sevillano M, Hernando-Momblona X, da Silva-Diz V, Muñoz P, *et al*: The intestinal stem cell signature identifies colorectal cancer stem cells and predicts disease relapse. *Cell Stem Cell* 8: 511-524, 2011.
5. Jung P, Sommer C, Barriga FM, Buczacki SJ, Hernando-Momblona X, Sevillano M, Duran-Frigola M, Aloy P, Selbach M, Winton DJ and Batlle E: Isolation of human colon stem cells using surface expression of PTK7. *Stem Cell Reports* 5: 979-987, 2015.
6. Kulsum S, Sudheendra HV, Pandian R, Ravindra DR, Siddappa G, R N, Chevour P, Ramachandran B, Sagar M, Jayaprakash A, *et al*: Cancer stem cell mediated acquired chemoresistance in head and neck cancer can be abrogated by aldehyde dehydrogenase 1 A1 inhibition. *Mol Carcinog* 56: 694-711, 2017.
7. Liu X, Wang L, Cui W, Yuan X, Lin L, Cao Q, Wang N, Li Y, Guo W, Zhang X, *et al*: Targeting ALDH1A1 by disulfiram/copper complex inhibits non-small cell lung cancer recurrence driven by ALDH-positive cancer stem cells. *Oncotarget* 7: 58516-58530, 2016.
8. Meng E, Mitra A, Tripathi K, Finan MA, Scalici J, McClellan S, Madeira da Silva L, Reed E, Shevde LA, Palle K and Rocconi RP: ALDH1A1 maintains ovarian cancer stem cell-like properties by altered regulation of cell cycle checkpoint and DNA repair network signaling. *PLoS One* 9: e107142, 2014.
9. Thomas ML, de Antueno R, Coyle KM, Sultan M, Cruickshank BM, Giacomantonio MA, Giacomantonio CA, Duncan R and Marcato P: Citral reduces breast tumor growth by inhibiting the cancer stem cell marker ALDH1A3. *Mol Oncol* 10: 1485-1496, 2016.
10. Yang L, Ren Y, Yu X, Qian F, Bian BS, Xiao HL, Wang WG, Xu SL, Yang J, Cui W, *et al*: ALDH1A1 defines invasive cancer stem-like cells and predicts poor prognosis in patients with esophageal squamous cell carcinoma. *Mod Pathol* 27: 775-783, 2014.
11. Chen C, Song G, Xiang J, Zhang H, Zhao S and Zhan Y: AURKA promotes cancer metastasis by regulating epithelial-mesenchymal transition and cancer stem cell properties in hepatocellular carcinoma. *Biochem Biophys Res Commun* 486: 514-520, 2017.
12. Eterno V, Zambelli A, Villani L, Tuscano A, Manera S, Spitaleri A, Pavesi L and Amato A: Aurka controls self-renewal of breast cancer-initiating cells promoting wnt3a stabilization through suppression of miR-128. *Sci Rep* 6: 28436, 2016.
13. Yang N, Wang C, Wang Z, Zona S, Lin SX, Wang X, Yan M, Zheng FM, Li SS, Xu B, *et al*: FOXM1 recruits nuclear aurora kinase A to participate in a positive feedback loop essential for the self-renewal of breast cancer stem cells. *Oncogene* 36: 3428-3440, 2017.
14. Zheng F, Yue C, Li G, He B, Cheng W, Wang X, Yan M, Long Z, Qiu W, Yuan Z, *et al*: Nuclear AURKA acquires kinase-independent transactivating function to enhance breast cancer stem cell phenotype. *Nat Commun* 7: 10180, 2016.
15. GursesCila HE, Acar M, Barut FB, Gunduz M, Grenman R and Gunduz E: Investigation of the expression of RIF1 gene on head and neck, pancreatic and brain cancer and cancer stem cells. *Clin Invest Med* 39: 27500, 2016.
16. Li P, Ma X, Adams IR and Yuan P: A tight control of Rif1 by oct4 and smad3 is critical for mouse embryonic stem cell stability. *Cell Death Dis* 6: e1588, 2015.
17. Mei Y, Peng C, Liu YB, Wang J and Zhou HH: Silencing RIF1 decreases cell growth, migration and increases cisplatin sensitivity of human cervical cancer cells. *Oncotarget* 8: 107044-107051, 2017.
18. Li M, Yang J, Zhou W, Ren Y, Wang X, Chen H, Zhang J, Chen J, Sun Y, Cui L, *et al*: Activation of an AKT/FOXM1/STMN1 pathway drives resistance to tyrosine kinase inhibitors in lung cancer. *Br J Cancer* 117: 974-983, 2017.
19. Obayashi S, Horiguchi J, Higuchi T, Katayama A, Handa T, Altan B, Bai T, Bao P, Bao H, Yokobori T, *et al*: Stathmin1 expression is associated with aggressive phenotypes and cancer stem cell marker expression in breast cancer patients. *Int J Oncol* 51: 781-790, 2017.
20. Sang Y, Li Y, Song L, Alvarez AA, Zhang W, Lv D, Tang J, Liu F, Chang Z, Hatakeyama S, *et al*: TRIM59 promotes gliomagenesis by inhibiting TC45 dephosphorylation of STAT3. *Cancer Res* 78: 1792-1804, 2018.
21. Zhou Z, Ji Z, Wang Y, Li J, Cao H, Zhu HH and Gao WQ: TRIM59 is up-regulated in gastric tumors, promoting ubiquitination and degradation of p53. *Gastroenterology* 147: 1043-1054, 2014.
22. Guiu J, Bergen DJ, De Pater E, Islam AB, Ayllon V, Gama-Norton L, Ruiz-Herguido C, González J, López-Bigas N, Menendez P, *et al*: Identification of Cdc7 as a novel Notch transcriptional target involved in hematopoietic stem cell emergence. *J Exp Med* 211: 2411-2423, 2014.
23. Imai T, Oue N, Sentani K, Sakamoto N, Uraoka N, Egi H, Hinoi T, Ohdan H, Yoshida K and Yasui W: KIF11 is required for spheroid formation by oesophageal and colorectal cancer cells. *Anticancer Res* 37: 47-55, 2017.
24. Jiang M, Zhuang H, Xia R, Gan L, Wu Y, Ma J, Sun Y and Zhuang Z: KIF11 is required for proliferation and self-renewal of docetaxel resistant triple negative breast cancer cells. *Oncotarget* 8: 92106-92118, 2017.
25. Venere M, Horbinski C, Crish JF, Jin X, Vasanji A, Major J, Burrows AC, Chang C, Prokop J, Wu Q, *et al*: The mitotic kinesin KIF11 is a driver of invasion, proliferation, and self-renewal in glioblastoma. *Sci Transl Med* 7: 304ra143, 2015.
26. Augustin I, Dewi DL, Hundshammer J, Erdmann G, Kerr G and Boutros M: Autocrine wnt regulates the survival and genomic stability of embryonic stem cells. *Sci Signal* 10: eaah6829, 2017.
27. Augustin I, Dewi DL, Hundshammer J, Rempel E, Brunk F and Boutros M: Immune cell recruitment in teratomas is impaired by increased Wnt secretion. *Stem Cell Res* 17: 607-615, 2016.
28. Ren M and Cowell JK: Constitutive notch pathway activation in murine ZMYM2-FGFR1-induced T-cell lymphomas associated with atypical myeloproliferative disease. *Blood* 117: 6837-6847, 2011.
29. Ren M, Qin H, Wu Q, Savage NM, George TI and Cowell JK: Development of ZMYM2-FGFR1 driven AML in human CD34+ cells in immunocompromised mice. *Int J Cancer* 139: 836-840, 2016.
